# Supplementary material for: Physics of polymer gels: Toyoichi Tanaka and after
Source: Royal Society of Chemistry journal article supplement (doi:10.1039/d4sm01418a), 2025-01-01
Supplement: d4sm01418a1.pdf [file d4sm01418a1.pdf]

Electronic Supplementary Information (ESI)

Physics of Polymer Gels: Toyochi Tanaka and After

Mitsuhiro Shibayama

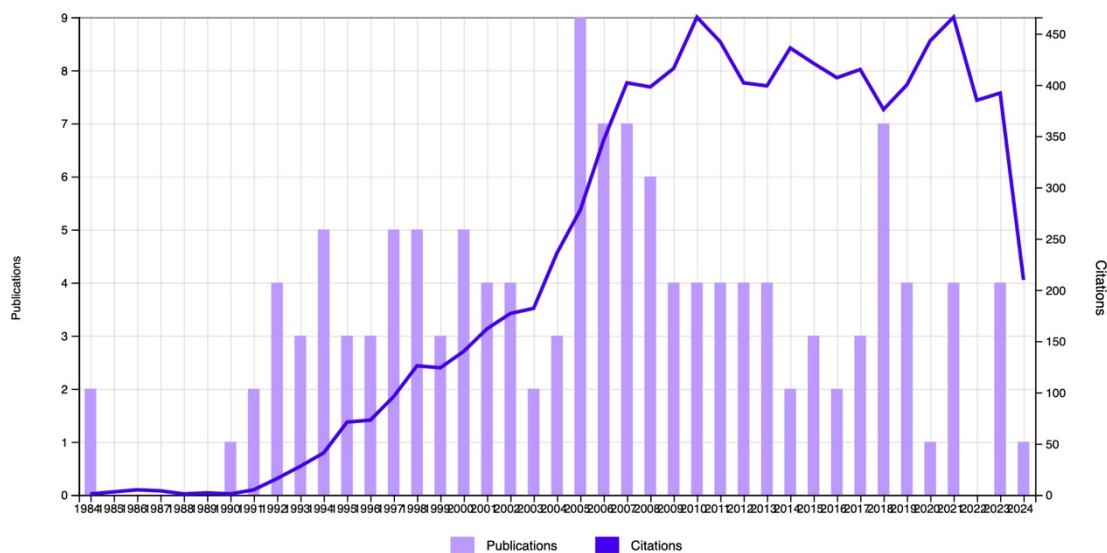

Fig. S1 Publication and citation statistics of Physical Review Letters with the keyword of “polymer gel”(1984 – 2024).

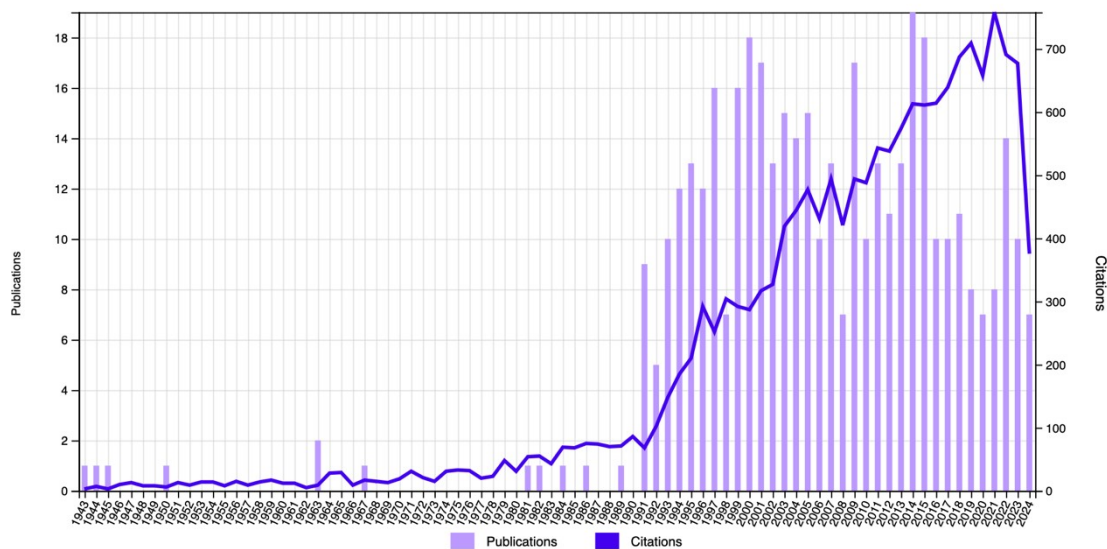

Fig. S2 Publication and citation of Journal of Chemical Physics with the keyword of “polymer gel” (1943 – 2024).

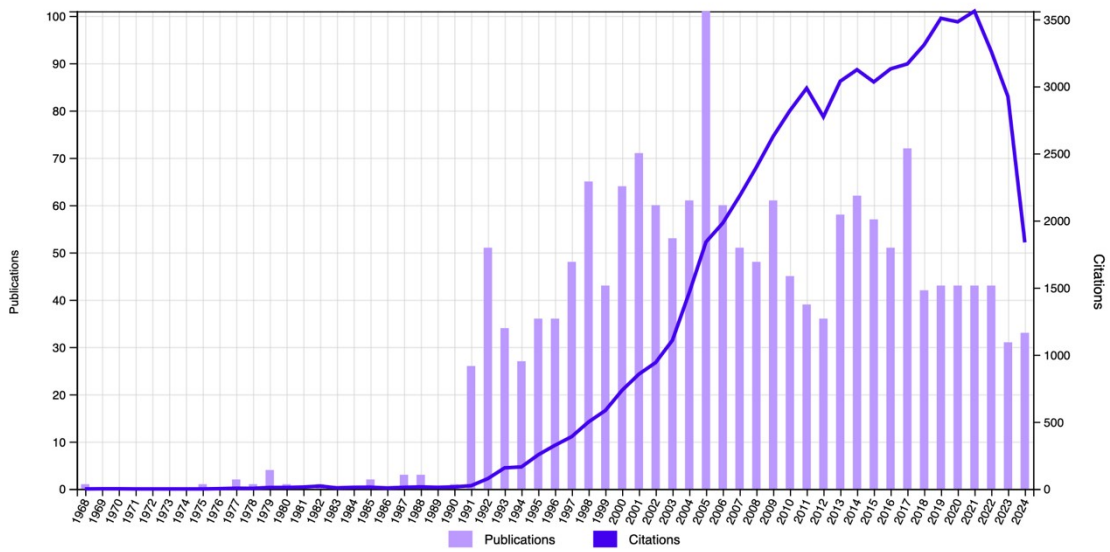

Fig. S3 Publication and citation statistics of Polymer with the keyword of “polymer gel” (1968 – 2024).

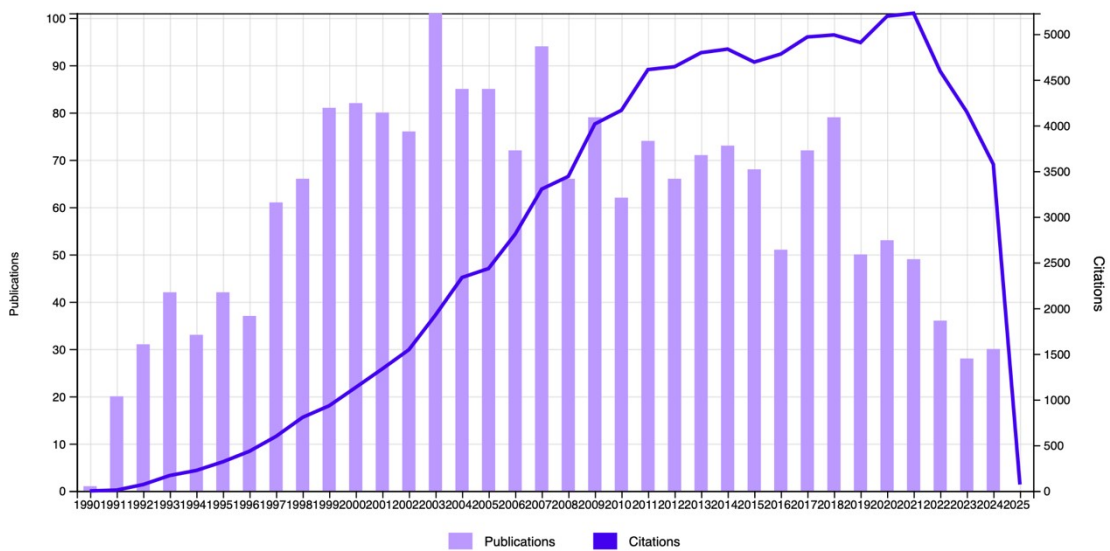

Fig. S4 Publication and citation statistics with the keywords of “volume phase transition AND polymer gel” (1990 – 2025).
